# Supplementary material
Source: PubMed Central journal article supplement (PMC3034404)

## **SUPPLEMENTAL DATA**

**Supplemental Table 1 - Interactome of FBXO25.** List of proteins associated an FBXO25 identified in MS analyses.

**Supplemental Figure 1 - Purified proteins were visualized by Coomassie Blue staining.** The bands taken for mass spectrometry analysis are indicated.

**Supplemental Figure 2 -** HEK293T cells were transient transfected with Skp1, CUL1, Roc1 and FBXO25. Cell nuclear extracts were generated by standard cell fractionation [10]. Nuclear fractions were subjected to immunoprecipitation with anti- $\beta$ -actin antibodies, and then the FBXO25 protein was detected by using anti-FBXO25 antibodies. The membrane was stripped and reprobed with anti-actin antibodies.

**Supplemental Figure 3** - Confocal microscopy of labeled FBXO25 in untreated and latrunculin-A-treated (0,5 µg/ml for 2 h) HeLa cells are shown. Without latrunculin-A treatment, FANDs were found in the nucleoplasm (Ai–Aiii). In the presence of latrunculin -A, the majority of endogenous (Bi–Biii) FANDs disappeared (B). (C) Proportion of cells containing FANDs was estimated. After treatment with latrunculin-A, the proportion of cells containing FANDs (red) significantly differs from the control population. Four separate experiments were performed, and around 100 cells were analyzed for latrunculin-A treatment.

**Supplemental Figure 4** - Confocal microscopy of labeled PML (green) in untreated and cytochalasin-D-treated (5 µg/ml for 24 h) HeLa cells are shown. After treatment with cytochalasin-D, the pattern of PML not differs from the control population.

**Supplemental Figure 5 - Analysis of nuclear  $\beta$ -actin degradation in the presence of FBXO25.** HEK293T cells were transient transfected with Skp1, CUL1, Roc1 in combination with full-length wild-type (WT) or mutant version of FBXO25 ( $\Delta F$ ), and incubated in the presence of DMSO (-) or 10 µM of MG132 for 12 hs (+) before harvesting. Cell nuclear extracts were generated by standard cell fractionation [10]. (A) Fifty micrograms of nuclear proteins were subjected to western blotting with anti- $\beta$ -actin antibodies. (B) Western blotting (WB) analysis of nuclear proteins immunoprecipitated (IP) using antibodies to  $\beta$ -actin. Note that FBXO25 does not affect the level of endogenous  $\beta$ -actin.

Supplemental Figure 1

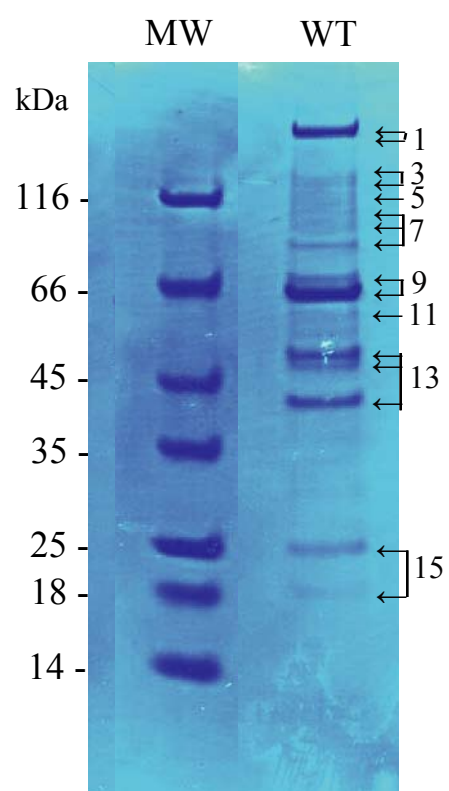

Supplemental Figure 2

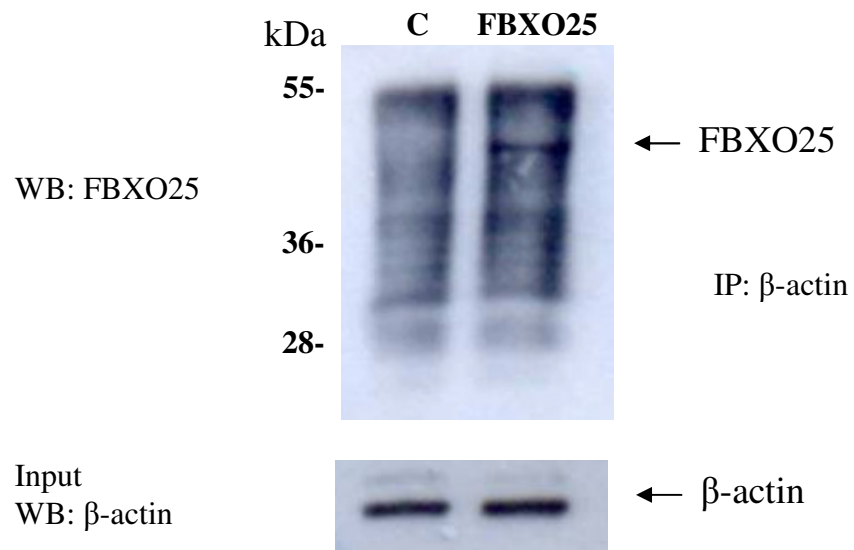

Supplemental Figure 3

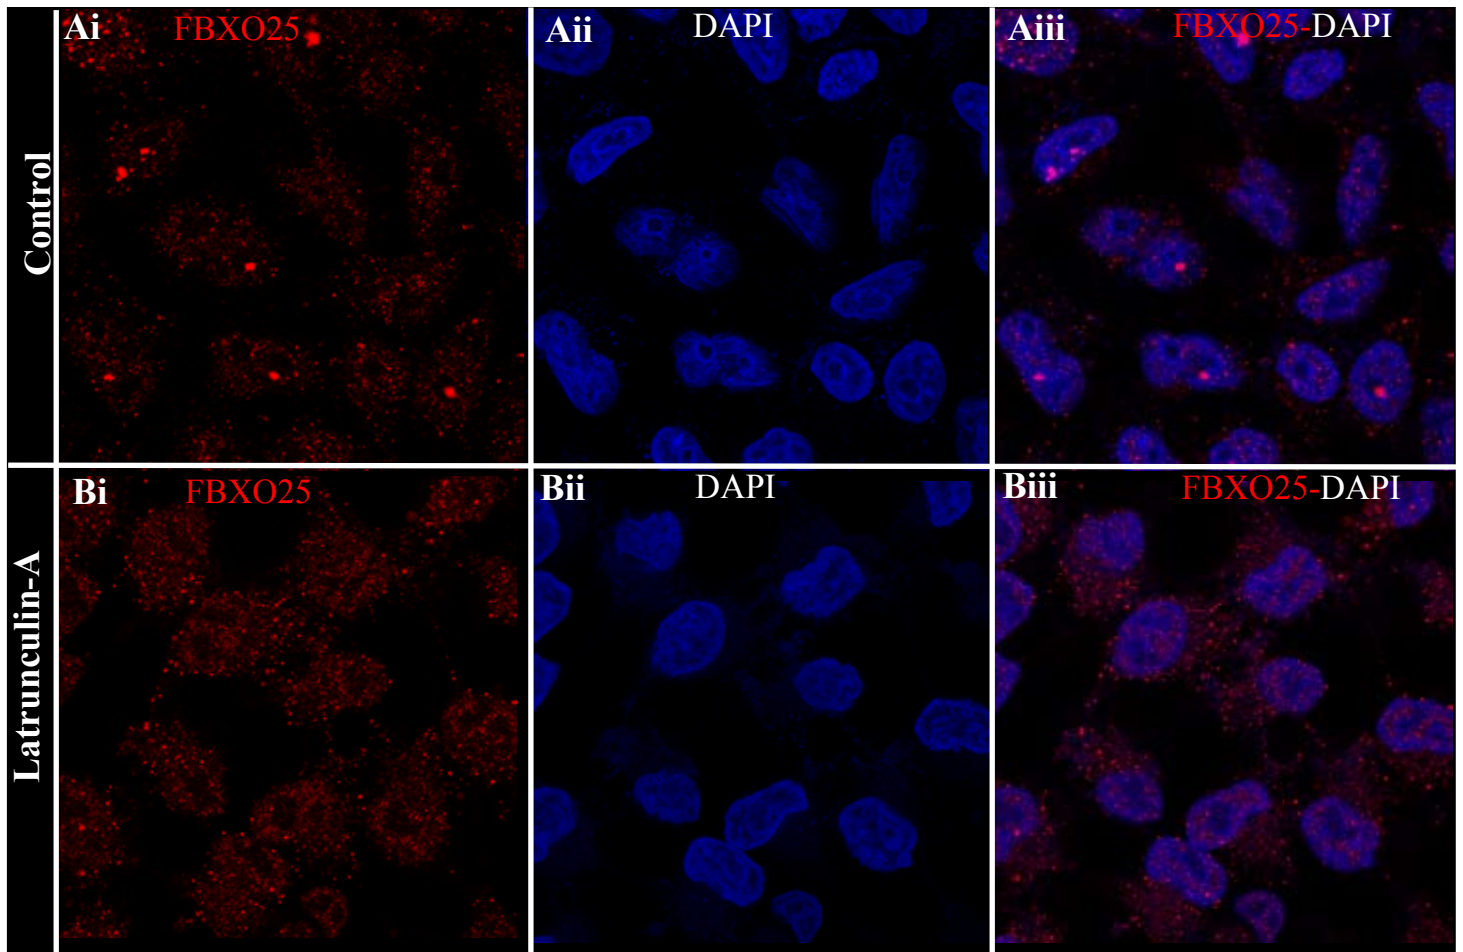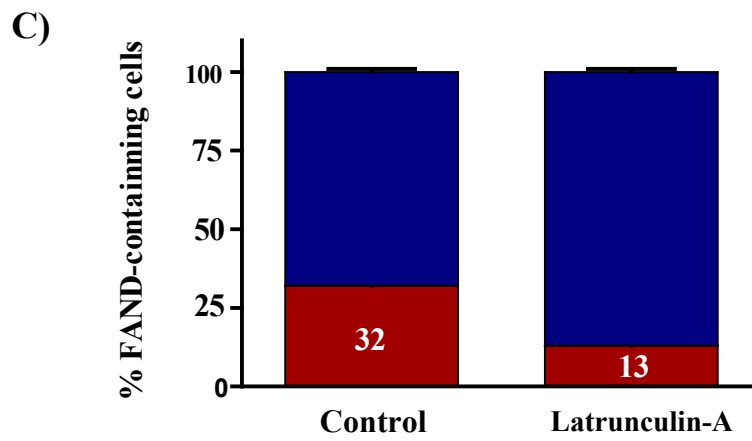

Supplemental Figure 4

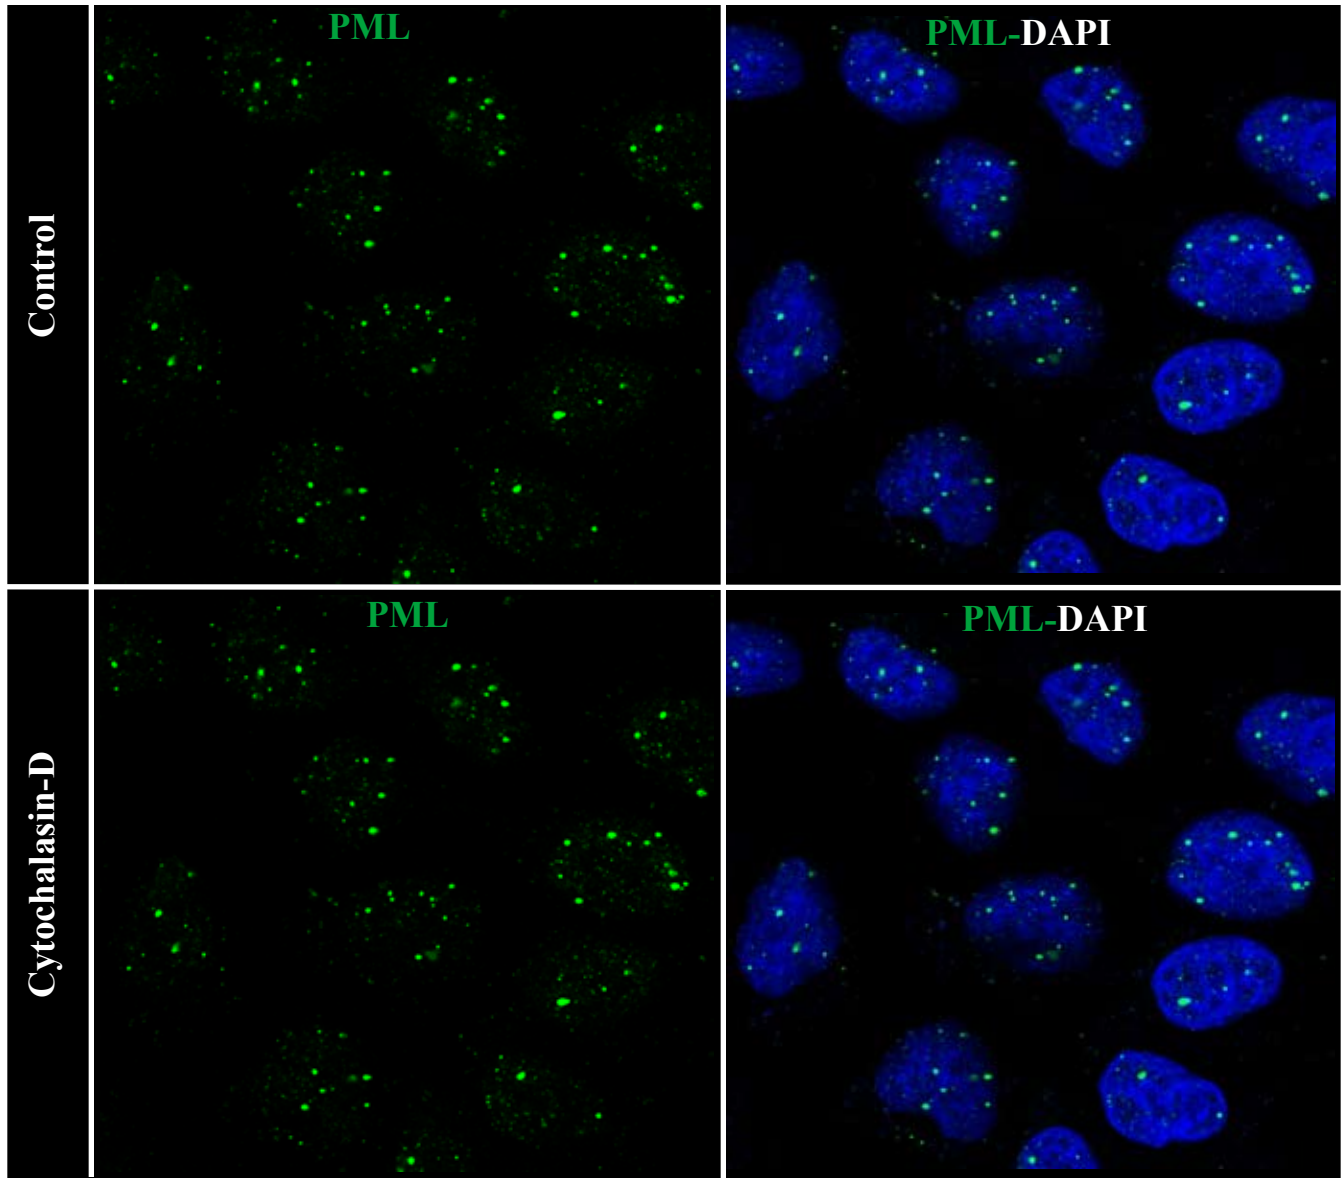

Supplemental Figure 5

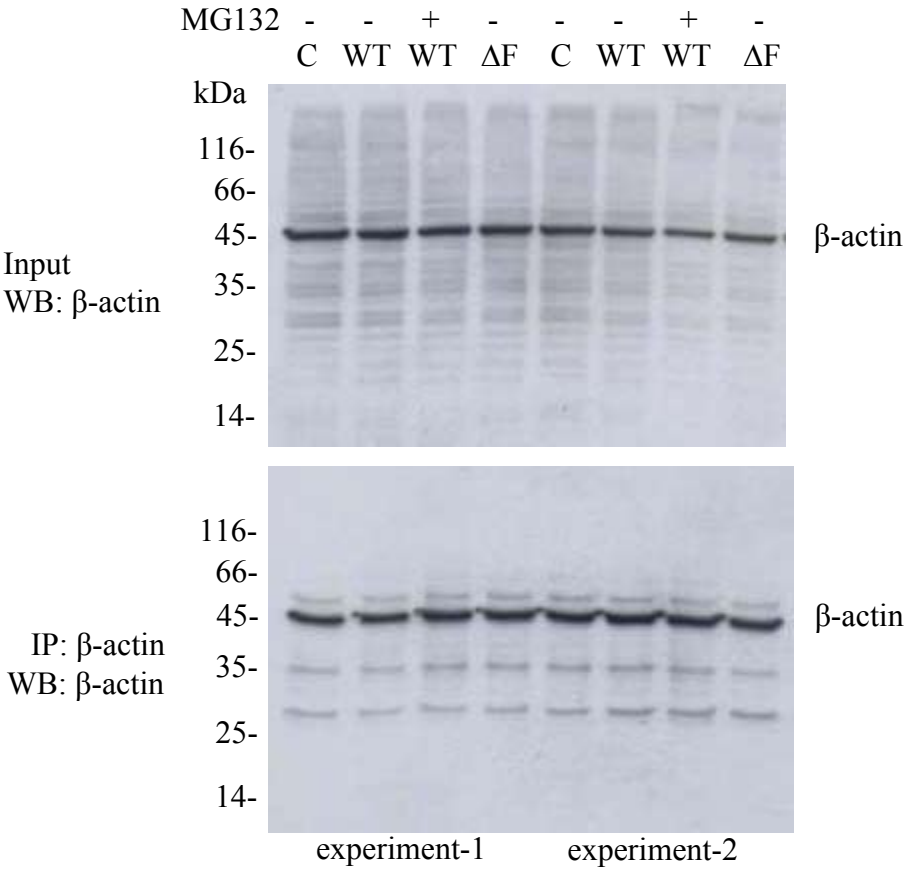

Supplement: NIHMS259443-supplement-supplement_1.pdf [file NIHMS259443-supplement-supplement_1.pdf]
